# Supplementary material for: Genome-edited ATP BINDING CASSETTE B1 transporter SD8 knockouts show optimized rice architecture without yield penalty
Source: PubMed Central journal article supplement — Plant Commun. 2022 Jun 10;3(5):100347. doi: 10.1016/j.xplc.2022.100347 (PMC9483111; doi:10.1016/j.xplc.2022.100347), 2022-06-10
Supplement: mmc1.pdf [file mmc1.pdf]

**Plant Communications, Volume 3**

**Supplemental information**

**Genome-edited ATP BINDING CASSETTE B1 transporter SD8 knock-outs show optimized rice architecture without yield penalty**

**Ruihong Qu, Pingxian Zhang, Qing Liu, Yifan Wang, Weijun Guo, Zhuoying Du, Xiulan Li, Liwen Yang, Shuangyong Yan, and Xiaofeng Gu**

---

1 SUPPLEMENTAL INFORMATION

2 Genome-edited ATP BINDING CASSETTE B1 transporter SD8 knockouts have  
3 optimized rice architecture without yield penalty

4  
5 Ruihong Qu<sup>1,5</sup>, Pingxian Zhang<sup>2,5</sup>, Qing Liu<sup>4,5</sup>, Yifan Wang<sup>1</sup>, Weijun Guo<sup>1</sup>, Zhuoying  
6 Du<sup>1</sup>, Xiulan Li<sup>1</sup>, Liwen Yang<sup>1,\*</sup>, Shuangyong Yan<sup>3,\*</sup>, Xiaofeng Gu<sup>1,\*</sup>

7  
8 <sup>1</sup>Biotechnology Research Institute, Chinese Academy of Agricultural Science, Beijing  
9 100081, China

10 <sup>2</sup>College of Life Science and Technology, Huazhong Agricultural University, Wuhan  
11 430070, Hubei, China

12 <sup>3</sup>Tianjin Key Laboratory of Crop Genetics and Breeding, Tianjin Crop Research  
13 Institute, Tianjin Academy of Agricultural Sciences, Tianjin 300384, China

14 <sup>4</sup>College of life sciences, Hebei agricultural university, Baoding 071001, Hebei, China

15 <sup>5</sup>These authors contributed equally.

16 \*Correspondence: Liwen Yang ([yangliwen@caas.cn](mailto:yangliwen@caas.cn)), Shuangyong Yan  
17 ([bioysy@139.com](mailto:bioysy@139.com)), Xiaofeng Gu ([guxiaofeng@caas.cn](mailto:guxiaofeng@caas.cn))

18  
19 **This PDF file includes:**

20 SI Materials and Methods

21 Figures S1 to S11 and Tables S1

22 SI References

23

24

---

25 **List of Supplemental Information:**

26 **Supplementary Figure 1. *SD8* knockout (KO) lines reduced the length of the main**

27 **culms.**

28 **Supplementary Figure 2. Phenotypes of *SD8* KO, and complemented lines.**

29 **Supplementary Figure 3. *SD8* KO lines did not cause significant differences in**

30 **grain morphology compared to Nipponbare (NIP).**

31 **Supplementary Figure 4. Statistical data of grain yield per plot and yield-related**

32 **traits in NIP and *sd8-1* under different planting density conditions.**

33 **Supplementary Figure 5. Expression pattern of *SD8* and subcellular location of**

34 ***SD8*.**

35 **Supplementary Figure 6. Analysis of auxin response in NIP and *sd8-1*.**

36 **Supplementary Figure 7. Statistical data of plant height and 1,000-grain weight in**

37 **wild type and *SD8* KO lines in the indicated backgrounds.**

38 **Supplementary Figure 8. qRT-PCR analysis for auxin-responsive genes and the**

39 **relative content of free IAA in JG, *JG-sd8*, LG, and *LG-sd8* lines.**

40 **Supplementary Figure 9. *SD8* KO lines in *japonica* rice variety Jingeng818 (JG),**

41 **Longgeng 31 (LG) and *indica* rice variety 93-11, YexiangB (YX), Nongxiang32**

42 **(NX), and Yuzhenxiang (YZX) backgrounds.**

43 **Supplementary Figure 10. The relative content of free IAA in wild type and *SD8***

44 **KO lines in the indicated backgrounds.**

45 **Supplementary Figure 11. Genetic diversity of *SD8* in the 3K RG dataset.**

46 **Table S1. Primer sequences for qRT-PCR genes.**

47  
48  
49  
50  
51  
52  
53

---

54 **SI Materials and Methods**

55 **Plant materials and growth conditions**

56 In this study, seven cultivars of rice (*Oryza sativa* L.) were used for creating  
57 CRISPR/Cas9 gene-editing lines, namely, three *japonica* cultivars Nipponbare (NIP),  
58 Jinggeng818 (JG), and Longgeng31 (LG), and four *indica* cultivars 9311, YexiangB  
59 (YX), Nongxiang32 (NX), and Yuzhenxiang (YZX). For phenotypic analysis, the plants  
60 were spaced 30 cm apart and grown at the Chinese Academy of Agricultural Sciences  
61 in Beijing (39°54'N, 116°23'E), China, from May to October of each year. For hormone  
62 analysis, rice plants were planted in water-soaked sand for germination, and after 3 days  
63 seeds were transferred into normal culture solution. Rice plants were grown in growth  
64 chambers with 60–70% humidity and a light/dark cycle of 12/12 h at 30/24°C.

65 **Transgene constructs and targeted gene editing**

66 To generate knockout plants using CRISPR/Cas9 technology, single-guide RNA  
67 targeting 5'-GCTGGACGGCCACGACCTGA-3' was cloned downstream of the *OsU6*  
68 promoter in the CRISPR/Cas9 binary vector BGK032 (Biogle Technology). These  
69 constructs were introduced into diverse rice backgrounds (two *japonica* varieties  
70 (Jinggeng818 (JG) and Longgeng31 (LG)) and four *indica* varieties (Nongxiang32 (NX),  
71 93-11, YexiangB (YX), and Yuzhenxiang (YZX)) by *Agrobacterium*-mediated  
72 transformation using standard protocols. For complementation of the *SD8-I* mutant, a  
73 DNA fragment containing the 2000 bp promoter and the full-length protein-coding  
74 sequence of *SD8/OsABCBI* (CDS: 4,035 bp) was amplified and inserted into a binary  
75 vector p23A between KpnI sites. For *SD8* overexpression, the full-length

---

76 *SD8/OsABCB1* protein-coding sequence was amplified from NIP and cloned into the  
77 vector pBS-2, then introduced into the plant binary vector pCAMBIA1304 to generate  
78 the fusion *pCaMV35S::SD8*. The transgenic rice plants were confirmed by quantitative  
79 real-time PCR (qPCR) or PCR detection and direct sequencing.

#### 80 **Subcellular localization**

81 A vector containing *p35S::SD8-GFP* was transiently expressed in rice protoplasts as  
82 described previously (Geng et al., 2020; Zhang et al., 2021). GFP fluorescence signals  
83 were observed and recorded using a Zeiss LSM 700 confocal laser-scanning  
84 microscope.

#### 85 **Pro: *SD8-GUS* analysis**

86 The *proSD8::GUS* transgenic plants were grown in standard rice culture solution. GUS  
87 staining of tissues was carried out as described previously (Zhang et al., 2021).

#### 88 **qRT-PCR assays**

89 Total RNA was prepared using RNeasy Plant Mini kit (Qiagen) and then contaminating  
90 genomic DNA was removed by digestion with recombinant DNase I (RNase-free,  
91 TAKARA) following the manufacturer's instructions. qRT-PCR was performed using  
92 SYBR Green Supermix (TOYOBO) on an Applied Biosystems 7500 Fast real-time  
93 PCR system. Relative expression of the selected genes was analyzed using the  $2^{-\Delta\Delta CT}$   
94 method (Zhang et al., 2021).

#### 95 **Quantification of IAA content and flux in rice plants**

96 Endogenous free IAA in rice plant 3 weeks seedling were quantified by gas  
97 chromatography-mass spectrometry (GC-MS) as described in Henrichs et al. (2012).

---

98 The measurements were carried out using a GC-MS system at the Central Laboratory  
99 of Biotechnology Research Institute, Chinese Academy of Agricultural Sciences.

100 IAA fluxes were monitored non-invasively in the roots of plants grown for 7 days in  
101 hydroponic solutions using SIET (model BIO-003A; Younger USA Science and  
102 Technology, Falmouth, MA, USA, and Xu-Yue Science and Technology, Beijing, China;  
103 <http://www.xuyue.net>) containing an IAA-sensitive amperometric sensor based on a  
104 carbon nanotube-coated external oxidizing platinum microelectrode as described  
105 previously (Henrichs et al., 2012; Yang et al., 2020). The net influx current was defined  
106 as the difference between currents recorded in the absence and presence of exogenous  
107 10 mM IAA. Fluxes were measured in the roots of at least 6-10 individual plants in two  
108 independent experiments.

109 **SD8/OsABCB1 functionality assays for auxin acquisition in the IAA-sensitive**  
110 **yeast strain *yap1-1***

111 The whole open reading frames of *SD8* was amplified by PCR from cDNA of rice using  
112 forward primers SD8F (5'-CGGAATTCATGGAGGAGGAGATAAAGGG-3'), with an  
113 EcoRI site incorporated at the 5' end, and reverse primers SD8R (5'-CCG  
114 CTCGAGCTAGGTGCCGTGTGTTGTTGTTG-3'), with an XhoI site incorporated at  
115 the 3' end. After EcoRI and XhoI double enzyme digestion, the fragment was inserted  
116 between the EcoRI and XhoI sites of yeast expression vectors pYES2 and pDR196  
117 (Yang et al., 2014). Subsequently, plasmids of pYES2, pDR196, *pYES2-SD8*, and  
118 *pDR196-SD8* were transformed into the IAA-sensitive mutant strain (*S. cerevisiae*)  
119 *yap1-1* (Prusty et al., 2004) as described previously (Yang et al., 2014). Positive  
120 transformants were selected on glucose containing solid SD-U medium without uracil,  
121 and single colonies were grown in liquid SD-U medium supplemented with 2%

---

122 galactose or glucose. For functionality assays, transformants grown in liquid SD-U  
123 medium to an OD600 of approximately 0.6 were washed and diluted to OD600 in  
124 deionized water. Cells were diluted 10-fold three times, and 3 ml of each dilution was  
125 spotted onto an SD-U medium plate supplemented with the indicated concentrations of  
126 IAA. The plates were incubated at 30°C for 3-5 days. The assays were performed with  
127 three independent transformants.

### 128 **Yield-related trait measurements**

129 All yield traits were measured when the plants had attained maturity. Panicle length,  
130 grain length, yield per plant, seed setting rate, and 1,000-grain weight were recorded.  
131 Yield per plant was scored as the total weight of grains from the entire plant. The  
132 number of tillers per plant was scored as the number of reproductive tillers for each  
133 plant. And 1,000-grain weight were measured using an automatic seed counting and  
134 analyzing instrument (Model SC-G; Wanshen). Plant height and panicle length were  
135 measured and analyzed.

### 136 **GWAS analysis**

137 The SNPs data on rice height (at the mature stage) were originated from previously  
138 reported 3k RG database (Wang et al., 2018). Briefly, we selected 3k RG 404k Core  
139 SNPs (MAF > 0.05 and missing rate <50%) to perform GWAS of plant height. The  
140 GWAS was conducted with a mixed linear model that was implemented in TASSEL  
141 v5.0 (Bradbury et al., 2007). We then selected  $p=2.78\times 10^{-5}$  (Benjamini–Hochberg FDR  
142 < 0.05) as the genome-wide significant cutoff followed by a previously conducted  
143 GWAS analysis (Duan et al., 2017).

### 144 **Population genetic analysis of *SD8***

---

145 The haplotypes of *SD8* in the 3k RG were classified according to all SNPs with minor  
146 allele frequency >0.01 within the CDS region using the RFGB v2.0 database. The  
147 haplotypes in at least 100 rice accessions were used for comparative analysis of plant  
148 height traits, which were downloaded from the Rice SNP-Seek Database (Alexandrov  
149 N et al., 2015). One-way ANOVA followed by Duncan's new multiple-range test was  
150 performed with the agricolae package in *R*. Haplotype networks were constructed using  
151 the pegas package in *R*. Nucleotide diversity ( $\pi$ ) and Tajima's D for each 50-kb window  
152 across the genome, with an overlapping 5-kb step size, were calculated for the 2-Mb  
153 region flanking *SD8* with the Variscan software (v2.0.3) (Vilella A et al.,2005).

#### 154 **Yield evaluation under different planting densities**

155 Paddy trials were performed at the Chinese Academy of Agricultural Sciences in  
156 Beijing (39°54'N, 116°23'E), China, from May to October of each year. For NIP and  
157 *sd8-1* lines, each rice plant was grown in a paddy field at a distance of 20x10 cm  
158 (280,000 plants/ha), and 20x5 cm (560,000 plants/ha). Each treatment was performed  
159 in three individual plots with randomized blocks. A hundred rice plants were harvested  
160 and used for analysis from each plot excluding marginal plants. After harvest, the  
161 samples were dried for 14 days at 37°C prior to measurements.

162

163



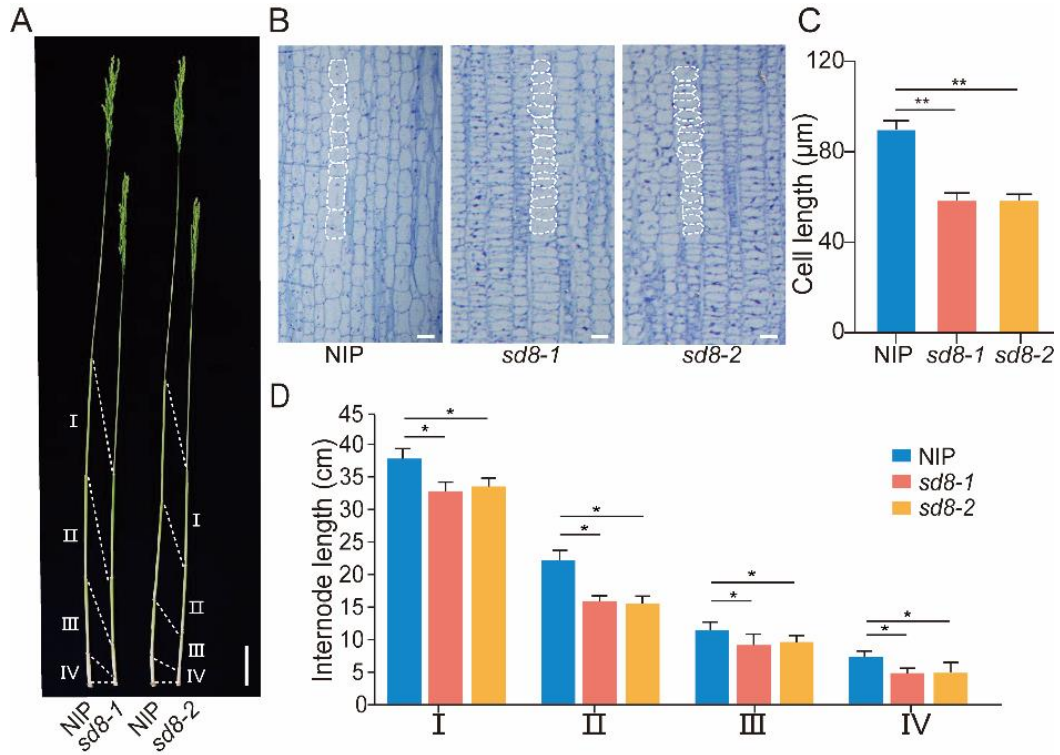

164

165 **Supplementary Figure 1. *SD8* knockout (KO) lines reduced the length of the main**  
 166 **culms.**

167 **(A)** Main culms of wild-type (NIP) and *SD8* knockout lines (*sd8-1* and *sd8-2*). Arrows  
 168 indicate nodes (scale bar:10 cm).

169 **(B)** Longitudinal sections of the elongated regions of the uppermost internodes of NIP,  
 170 *sd8-1*, and *sd8-2* (Scale bars:50 μm for the longitudinal sections).

171 **(C)** Statistical data of the cell length in the longitudinal sections in B.

172 **(D)** Internode lengths of *SD8* KO lines (*sd8-1* and *sd8-2*) and NIP rice plants. Data  
 173 indicate mean ± SD (n = 18). (\*\**p* < 0.01; \**p* < 0.05, Student's *t*-test).

174

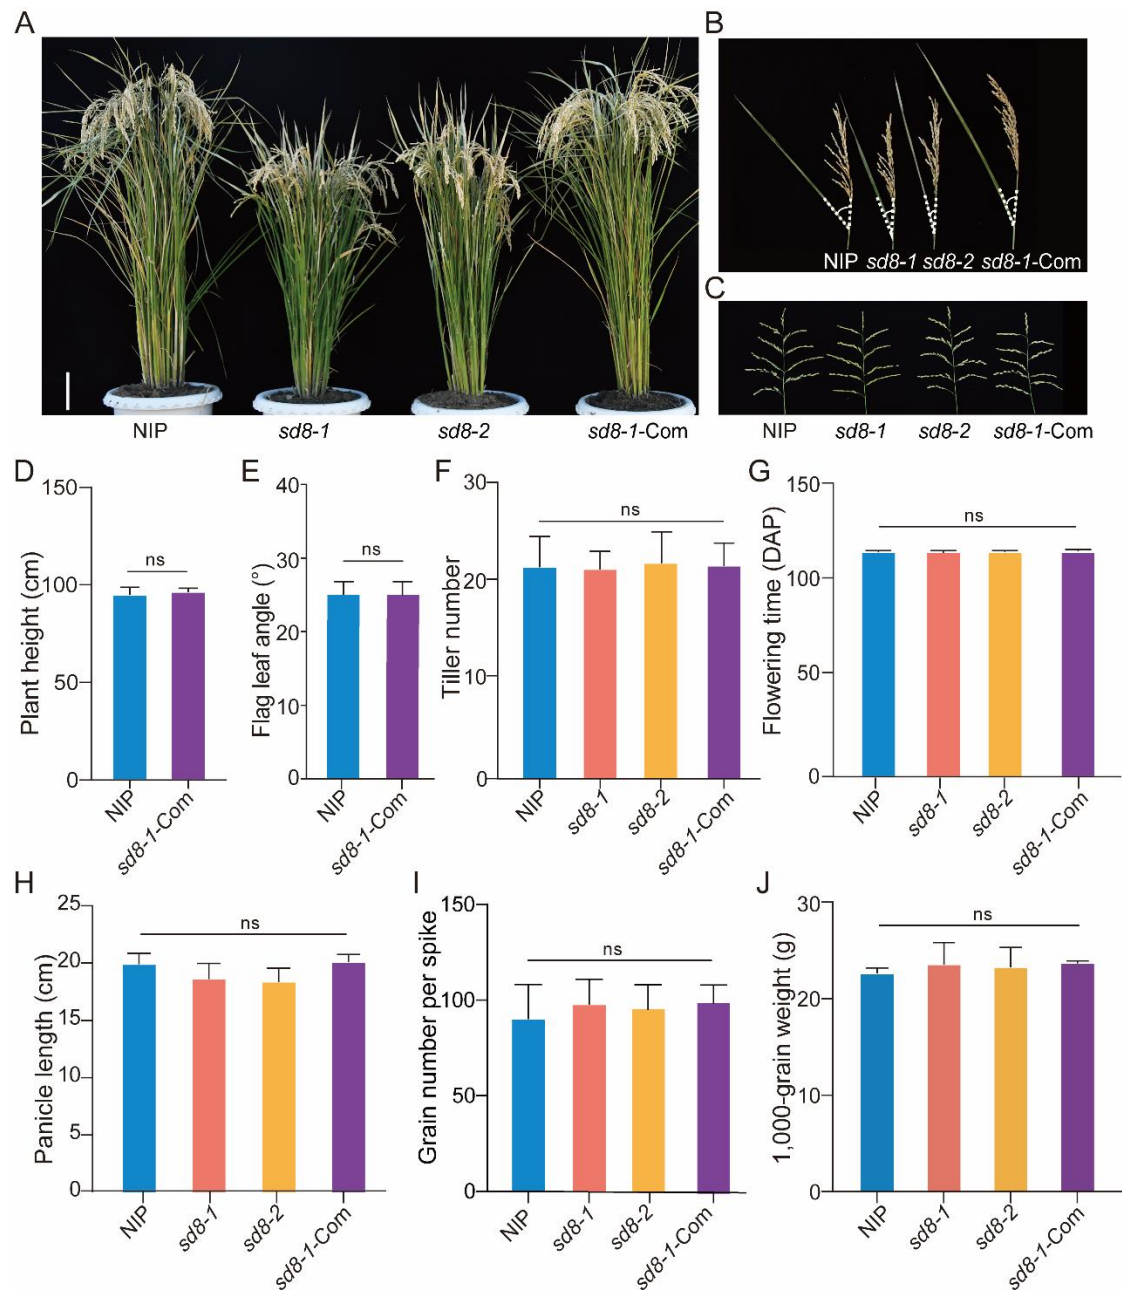

175

176

**Supplementary Figure 2. Phenotypes of *SD8* KO and complemented lines.**

177 **(A)** Plant architecture of mature stage NIP, *sd8-1*, *sd8-2*, and *sd8-1-Com*. (scale bar: 10  
178 cm).

179 **(B)** The flag leaf angle in NIP, *sd8-1*, *sd8-2*, and *sd8-1-Com* plants.

180 **(C)** The panicle morphology in NIP, *sd8-1*, *sd8-2*, and *sd8-1-Com* plants.

181 **(D)** Comparison of plant height between NIP and *sd8-1-Com*.

182 **(E)** Comparison of flag angle between NIP and *sd8-1-Com*.

183 **(F-J)** Comparison of tiller number, flowering time, panicle length, grain number per

184 spike, and 1,000-grain weight in NIP, *sd8-1*, *sd8-2*, and *sd8-1-Com*. Data represent

185 mean  $\pm$  SD (n=24). (\*\* $p < 0.01$ ; \* $p < 0.05$ , Student's  $t$ -test).

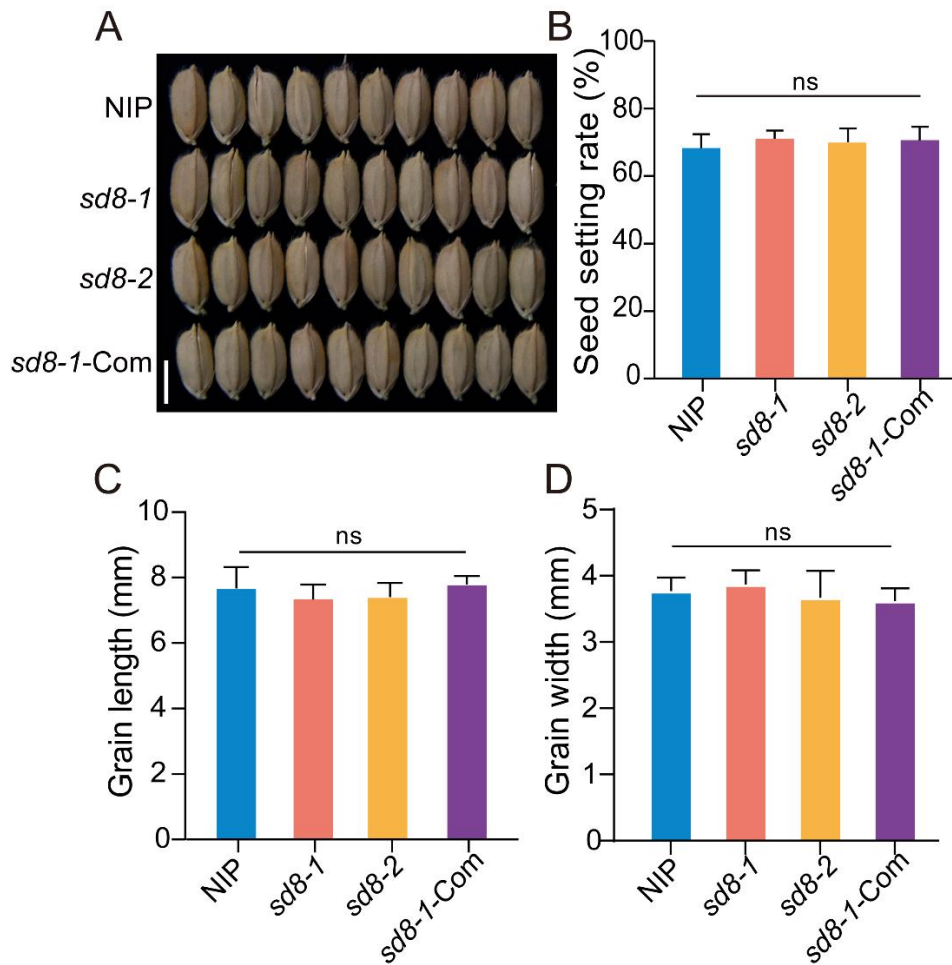

186

187 **Supplementary Figure 3. *SD8* KO lines did not cause significant differences in**  
188 **grain morphology compared to NIP.**

189 **(A)** Grain morphology of NIP, *sd8-1*, *sd8-2*, and *sd8-1-Com*. (Scale bar:0.5 cm).

190 **(B)** Comparison of seed setting rate in NIP, *sd8-1*, *sd8-2*, and *sd8-1-Com*. Data  
191 represent mean  $\pm$  SD (n = 24).

192 **(C-D)** Statistical data of the grain length (C) and width (D). (\*\* $p < 0.01$ ; \* $p < 0.05$ ,  
193 Student's  $t$ -test).

194

195

196

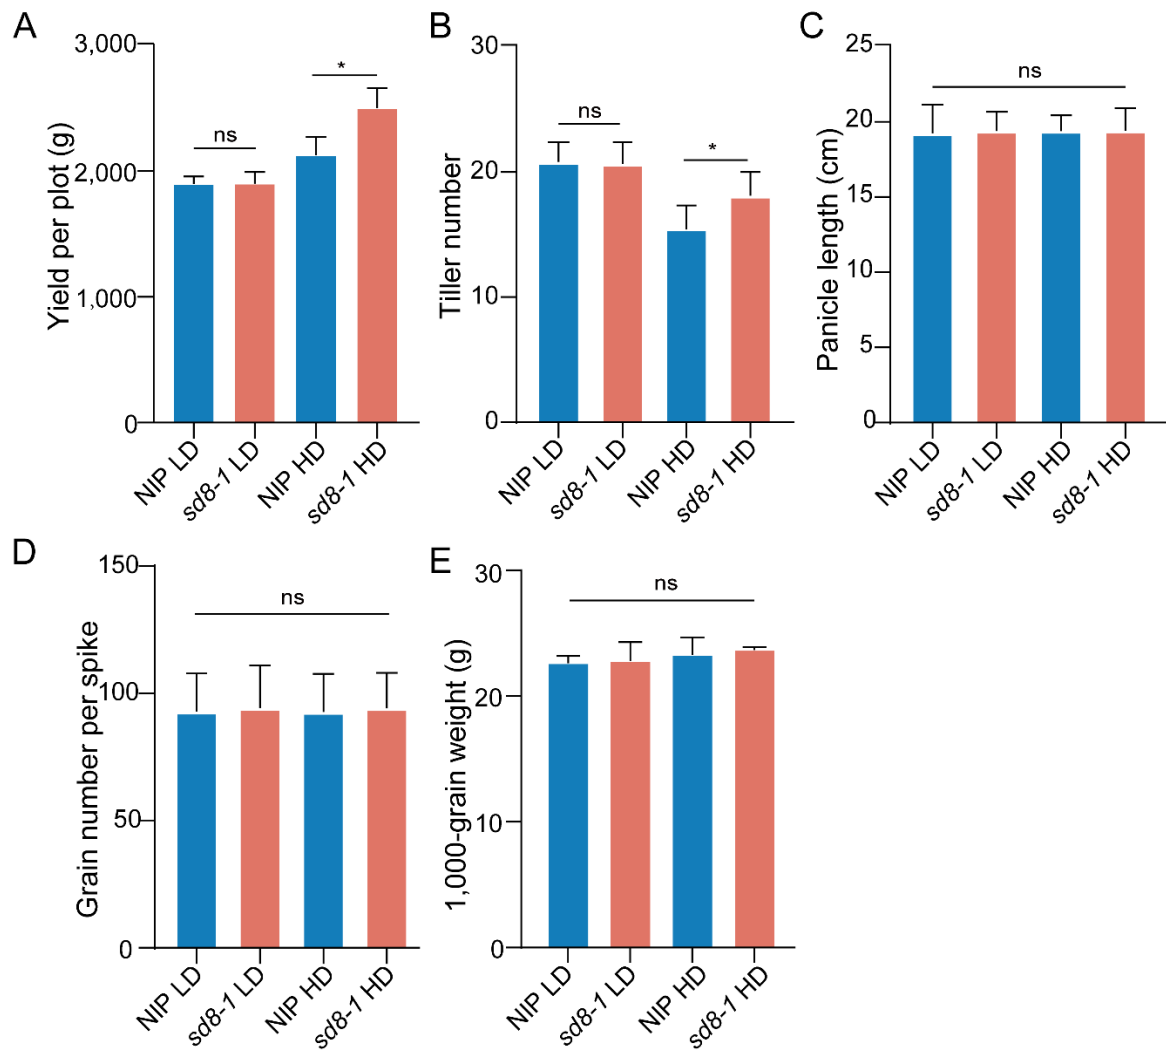

197

198 **Supplementary Figure 4. Statistical data of grain yield per plot and yield-related**  
 199 **traits in NIP and *sd8-1* under different planting density conditions.**

200 **(A)** Grain yield per plot at high and low densities.

201 **(B-E)** Statistical data of yield-related traits in NIP and *sd8-1* under different planting  
 202 density conditions. Different characters indicate significant differences. (\*\* $p < 0.01$ ;  
 203 \* $p < 0.05$ , Student's *t*-test).

204

205

206

207

208

209

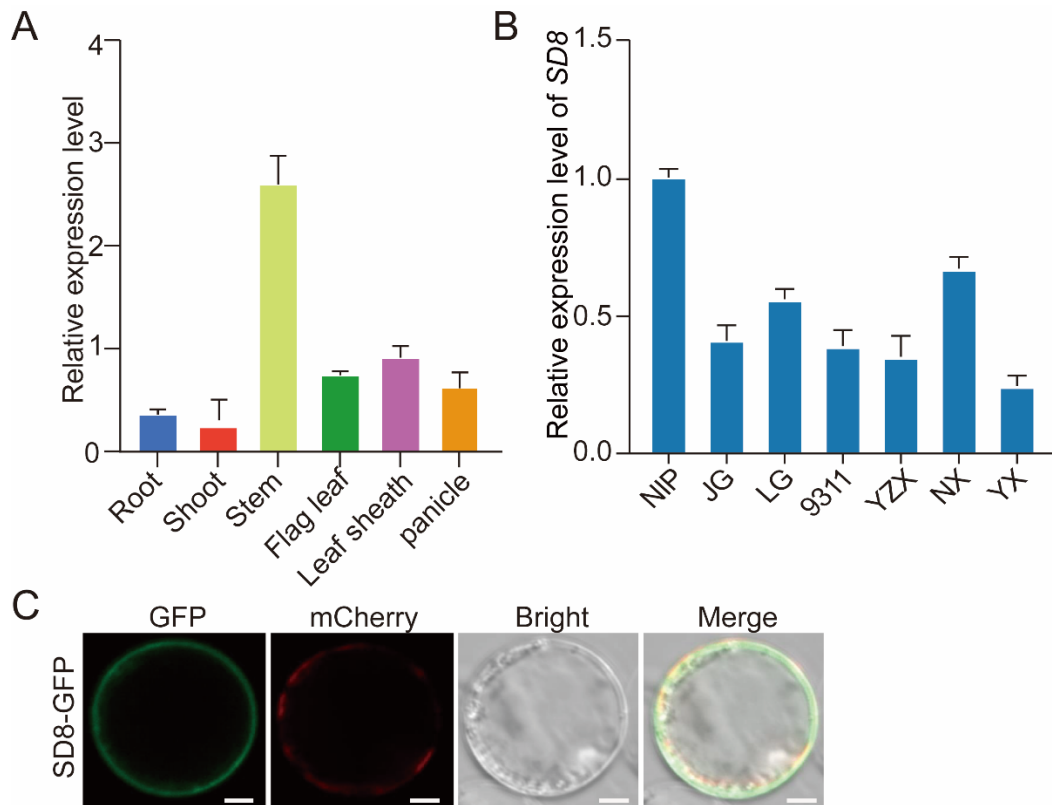

210

211

212 **Supplementary Figure 5. Expression pattern of *SD8* and subcellular location of**  
 213 ***SD8*.**

214 **(A)** Relative expression level of *SD8* in each tissue of NIP at different growth stages.

215 NIP was cultivated in normal culture solution for 3 weeks and transferred to the field.

216 **(B)** Quantitative real-time PCR (qPCR) analysis of expression level of *SD8* between

217 *indica* (9311, YZX, NX, YX) and *japonica* (NIP, JG, LG) rice varieties. All qRT-PCR

218 experiments were analyzed using three independent biological repeats.

219 **(C)** Subcellular localization of SD8/OsABCB1 in rice protoplasts. (Scale bars: 10  $\mu$ m).

220

221

222

223

224

225

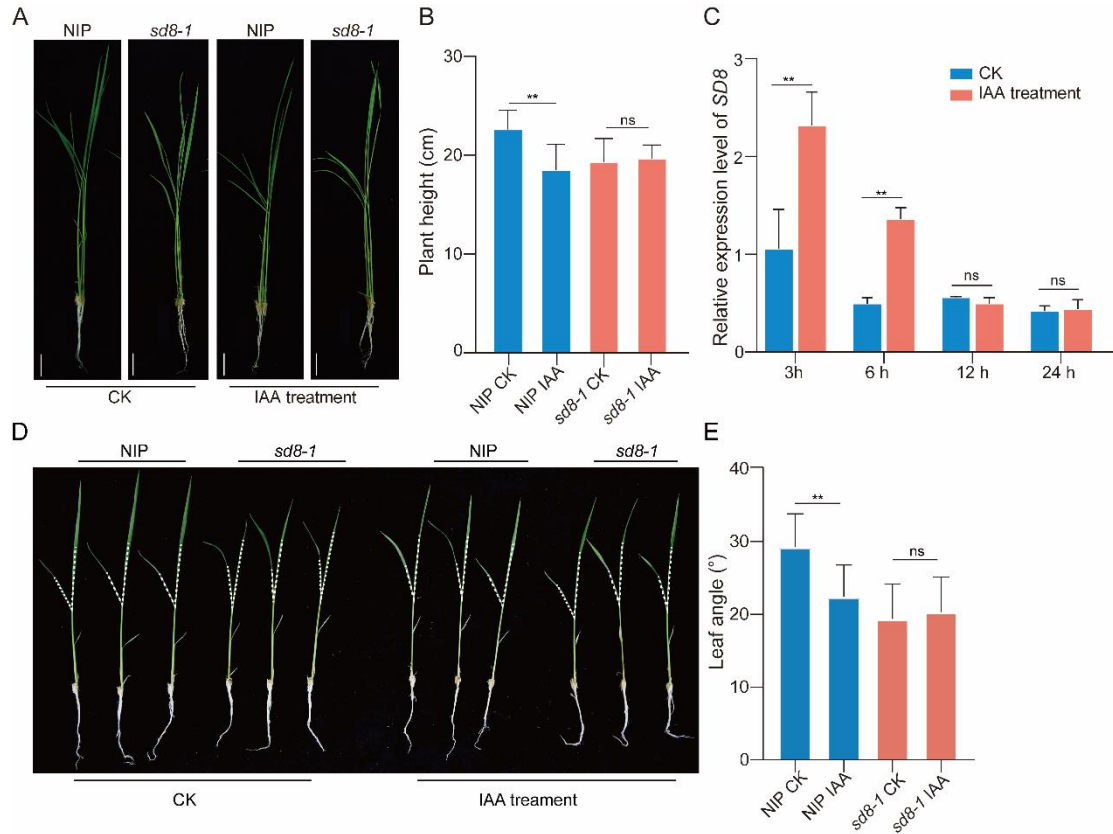

226

227 **Supplementary Figure 6. Analysis of auxin response in NIP and *sd8-1*.**

228 **(A)** Phenotype of NIP and *sd8-1* for 10-day-old seedlings under normal conditions (CK)  
 229 and 10  $\mu$ M IAA treatments 3 days. (Scale bars:2 cm).

230 **(B)** Statistical data of shoot length in NIP and *sd8-1* under 10  $\mu$ M concentrations of  
 231 IAA 3days.

232 **(C)** Expression of *SD8* in 10  $\mu$ M IAA treatments at the indicated time intervals. 10-day-  
 233 old seedlings grown in normal culture solution were exposed to 10  $\mu$ M IAA treatments  
 234 until shoots were sampled at the indicated time intervals. qRT-PCR experiments were  
 235 analyzed using three independent biological repeats. The *OsACTIN* gene was used as  
 236 an internal control.

237 **(D)** Phenotype of NIP and *sd8-1* for 7-day-old seedlings under normal conditions (CK)  
 238 and 10  $\mu$ M IAA treatments 4 days.

239 **(E)** Statistical data of leaf angle in NIP and *sd8-1* under 10  $\mu$ M concentrations of IAA  
 240 4 days. Data represent mean  $\pm$  SD (n=35). (\*\* $p < 0.01$ ; \* $p < 0.05$ , Student's t-test).

241

242

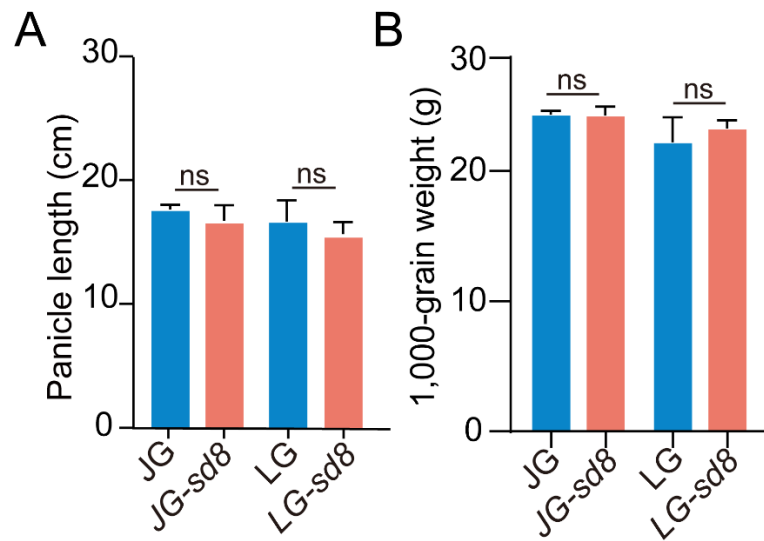

243

244 **Supplementary Figure 7. Statistical data of plant height and 1,000-grain weight in**  
245 **wild type and *SD8* KO lines in the indicated backgrounds.**

246 (A) Statistical data of plant height in wild type and *SD8* KO lines in JG and LG.

247 (B) Statistical data of 1,000-grain weight in wild type and *SD8* KO lines in JG and LG.

248 (\*\* $p < 0.01$ ; \* $p < 0.05$ , Student's *t*-test).

249

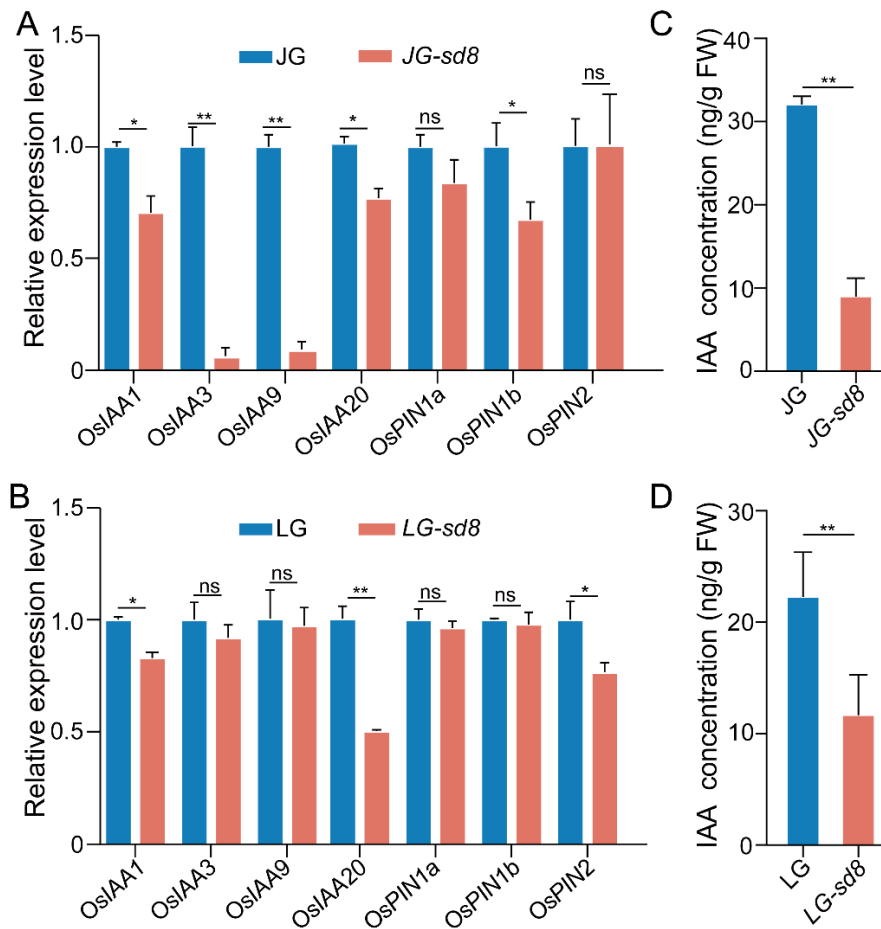

250

251 **Supplementary Figure 8. qRT-PCR analysis for auxin-responsive genes and the**  
 252 **relative content of free IAA in JG, *JG-sd8*, LG, and *LG-sd8* lines.**

253 **(A-B)** Relative expression levels of *OsIAA1/3/9/20* and *OsPIN1a/1b/2* in 3-week-old  
 254 seedlings of JG, *JG-sd8* (A), LG, and *LG-sd8* lines (B) *OsACTIN* gene was used as an  
 255 internal control. All qRT-PCR experiments were analyzed using three independent  
 256 biological repeats. (\*\* $p < 0.01$ ; \* $p < 0.05$ , Student's *t*-test).

257 **(C-D)** The relative content of free IAA in 3-week-old seedlings of JG, *JG-sd8*(C), LG,  
 258 and *LG-sd8* lines (D).

259



**A** Target site on *SD8*:

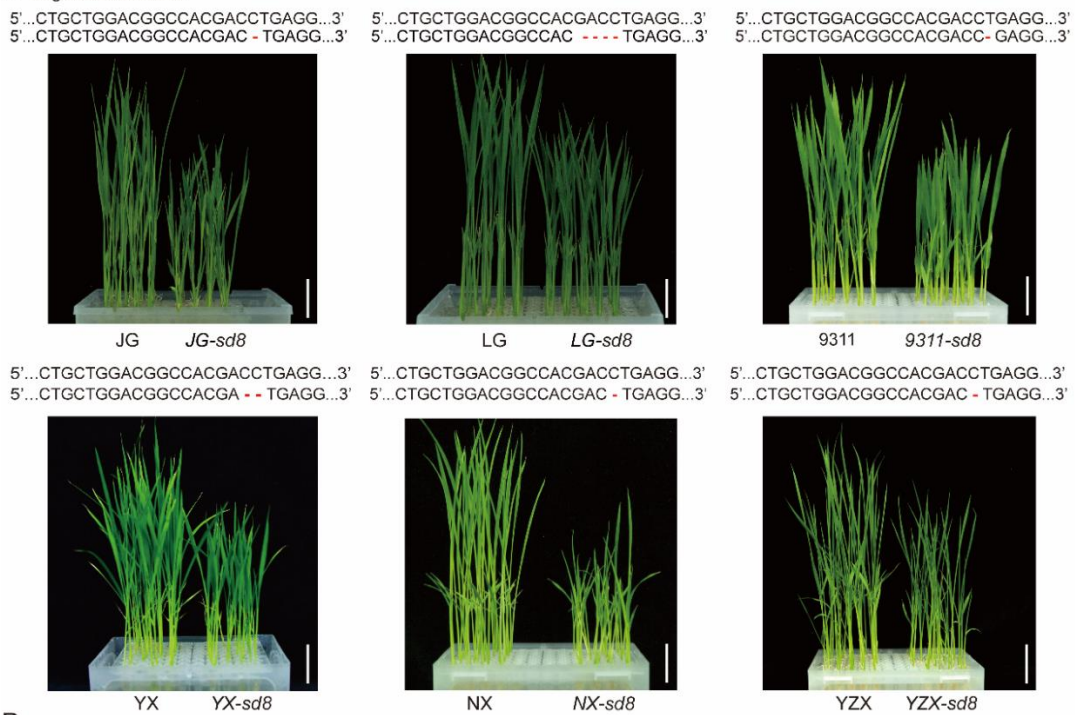

**B**

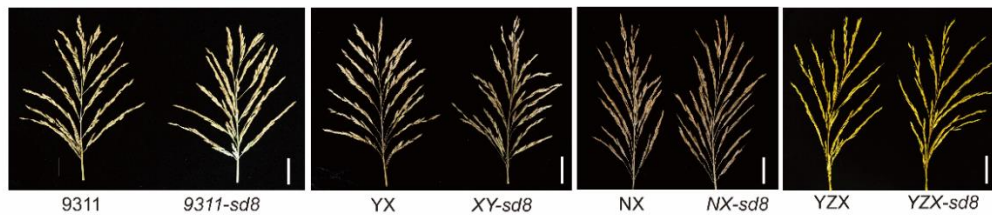

**C**

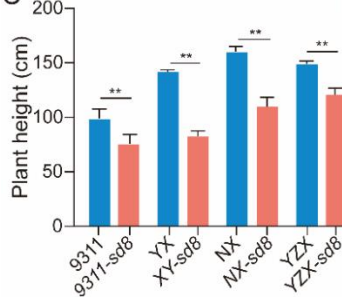

**D**

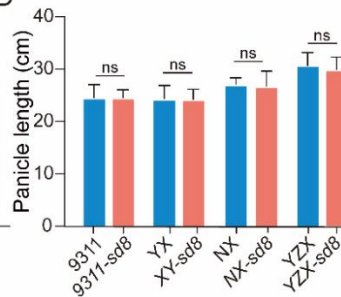

**E**

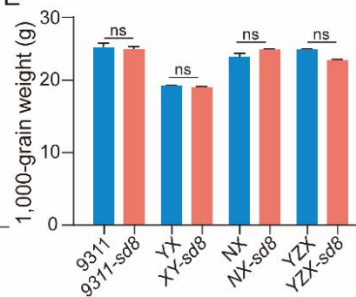

260

261 **Supplementary Figure 9. *SD8* KO lines in *japonica* rice variety Jingeng818 (JG),**  
 262 **Longgeng 31 (LG) and *indica* rice variety 93-11, YexiangB (YX), Nongxiang32**  
 263 **(NX), and Yuzhenxiang (YZX) backgrounds.**

264 (A) Phenotypes of *SD8* KO lines in the indicated backgrounds. (Scale bars:2 cm).

265 (B) Panicle phenotype of wild type and *SD8* KO lines in NX, 9311, YX, and YZX  
 266 backgrounds. (Scale bars:5 cm).

267 (C) Statistical data of plant height in wild type and *SD8* KO lines in 9311, YX, YZX,  
 268 and NX.

---

269 **(D)** Statistical data of panicle length in wild type and *SD8* KO lines in the indicated  
270 backgrounds.

271 **(E)** Statistical data of 1,000-grain weight in wild type and *SD8* KO lines in the indicated  
272 backgrounds. (\*\* $p < 0.01$ ; \* $p < 0.05$ , Student's *t*-test).

273

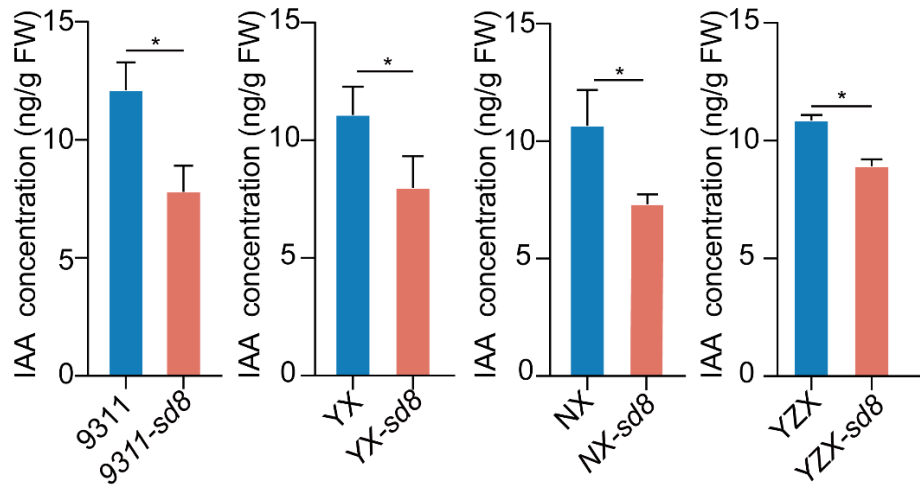

274

275 **Supplementary Figure 10. The relative content of free IAA in wild type and *SD8***

276 **KO lines in the indicated backgrounds.** GC-MS analysis of endogenous free IAA

277 concentrations in wild type and *SD8* KO lines in the indicated backgrounds. All

278 experiments were analyzed using three independent biological repeats. (\*\* $p < 0.01$ ;

279 \* $p < 0.05$ , Student's *t*-test).

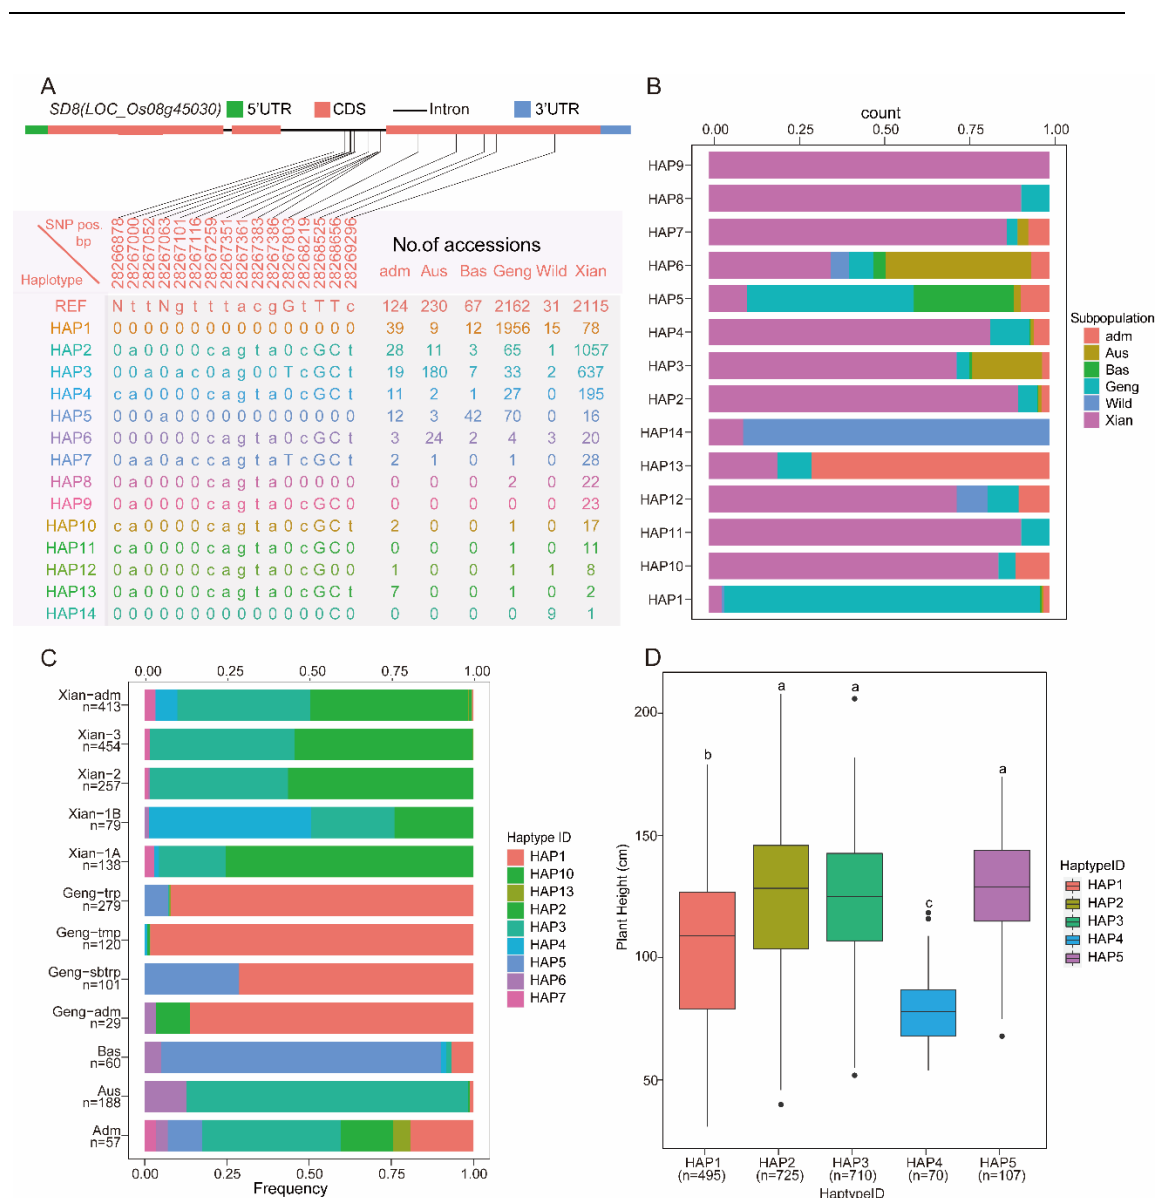

280

281 **Supplementary Figure 11. Genetic diversity of *SD8* in the 3K RG dataset.**

282 (A) Haplotypes of *SD8* (*LOC\_Os08g45030*) in 1,978 accessions of 3K RG (rare  
 283 haplotypes of <100 accessions are not shown) using 5 SNPs in the CDS region.  
 284 Lowercase letters represent synonymous mutations, whereas uppercase letters indicate  
 285 non-synonymous mutations.

286 (B) Haplotype network of *SD8* in 3K RG.

287 (C) Haplotype frequency of *SD8* in subpopulations of 3K RG.

288 (D) Performance distribution of different haplotypes of *SD8* in 3K RG. Different letters  
 289 on plant height in 3K RG. Different letters in the boxplots indicate statistically  
 290 significant differences (n = Hap number;  $p < 0.01$ , Duncan's new multiple range tests).

291

292

**Table S1.** The primers for qRT-PCR analysis of *SD8*, *OsIAAs*, *OsPINs*.

| Gene name      | Forward primer 5'-3'     | Reverse primer 5'-3'     |
|----------------|--------------------------|--------------------------|
| <i>SD8</i>     | CTGTCCAGCACCTCTTCTGG     | GTCCTCCATGTCGAACCAGG     |
| <i>OsIAA1</i>  | GCCGCTCAATGAGGCATT       | GCTTCCACTTTCTTTCAATCCAA  |
| <i>OsIAA3</i>  | AACTGAACAACAACAAGAAGAA   | GCAATGAGGAGATGAGATGA     |
| <i>OsIAA9</i>  | AAGAAAATGGCCAATGATGATCA  | CCCATCACCATCCTCGTAGGT    |
| <i>OsIAA9</i>  | TTGTACGTGAACGGGATTATTTTG | CATGCTTATGAAATTGCTGAAACA |
| <i>OsPIN1a</i> | TCATCTGGTCGCTCGTCTGC     | CGAACGTCGCCACCTTGTTTC    |
| <i>OsPIN1b</i> | TGCACCCTAGCATTCTCAGCA    | CCCTCCTCCCAAATTCTACTTC   |
| <i>OsPIN2</i>  | CAGGGCTAGGAATGGCTATGT    | GCAAACACAAACGGGACAA      |

293

294

---

295 **SI References**

296 **Geng, Y., Zhang, P., Liu, Q., Wei, Z., Riaz, A., Chachar, S., and Gu, X.** (2020). Rice  
297 homolog of Sin3-associated polypeptide 30, OsSFL1, mediates histone  
298 deacetylation to regulate flowering time during short days. *Plant Biotechnol. J.*  
299 **18:325-327.**

300 **Zhang, P., Zhu, C., Geng, Y., Wang, Y., Yang, Y., Liu, Q., Guo, W., Chachar, S.,**  
301 **Riaz, A., Yan, S., et al.** (2021). Rice and *Arabidopsis* homologs of yeast  
302 CHROMOSOME TRANSMISSION FIDELITY PROTEIN 4 commonly interact  
303 with Polycomb complexes but exert divergent regulatory functions. *Plant Cell*  
304 **33:1417-1429.**

305 **Henrichs, S., Wang, B., Fukao, Y., Zhu, J., Charrier, L., Bailly, A., Oehring, S.C.,**  
306 **Linnert, M., Weiwad, M., Endler, A., et al.** (2012). Regulation of  
307 ABCB1/PGP1-catalysed auxin transport by linker phosphorylation. *EMBO J.*  
308 **31:2965-2980.**

309 **Alexandrov, N., Tai, S., Wang, W., Mansueto, L., Palis, K., Fuentes, RR., Ulat, VJ.,**  
310 **Chebotarov, D., Zhang, G., Li, Z., et al.** (2015). SNP-Seek database of SNPs  
311 derived from 3000 rice genomes. *Nucleic Acids Res.* **43:1023-1027.**

312 **Vilella, A., Blanco-Garcia, A., Hutter, S., Rozas, J.** (2005). Analysis of evolutionary  
313 patterns from large-scale DNA sequence polymorphism data. *Bioinformatics.*  
314 **21:2791-2793.**

315 **Yang, T., Feng, H., Zhang, S., Xiao, H., Xu, G.** (2020). Potassium transporter  
316 OsHAK5 alters rice architecture via ATP-dependent transmembrane auxin fluxes.  
317 *Plant Com.* **1:100052.**

318 **Prusty, R., Grisafi, P., Fink, G.R.** (2004). The plant hormone indoleacetic acid  
319 induces invasive growth in *Saccharomyces cerevisiae*. *Proc. Natl. Acad. Sci. U S*  
320 *A.* **101:4153-4157.**

321 **Yang, T., Zhang, S., Hu, Y., Wu, F., Hu, Q., Chen, G., Cai, J., Wu, T., Moran, N.,**  
322 **Yu, L., et al.** (2014). The role of a potassium transporter OsHAK5 in potassium  
323 acquisition and transport from roots to shoots in rice at low potassium supply

---

324 levels. *Plant Physiol.* **166**:945–957.  
325 **Wang, W., Mauleon, R., Hu, Z., Chebotarov, D., Tai, S., Wu, Z., Li, M., Zheng, T.,**  
326 **Fuentes, RR., Zhang, F., et al.** (2018). Genomic variation in 3,010 diverse  
327 accessions of Asian cultivated rice. *Nature* **557**:43-49.  
328 **Bradbury, PJ., Zhang, Z., Kroon, D.E., Casstevens, T.M., Ramdoss, Y., Buckler,**  
329 **E. S.** (2007). TASSEL: software for association mapping of complex traits in  
330 diverse samples. *Bioinformatics.* **23**:2633.  
331 **Duan, P., Xu, J., Zeng, D., Zhang, B., Geng, M., Zhang, G., Huang, K., Huang, L.,**  
332 **Xu, R., Ge, S., et al.** (2017). Natural variation in the promoter of GSE5 contributes  
333 to grain size diversity in rice. *Mol. Plant* **10**:685-694.
